# Supplementary material for: Single-cell meta-analysis of SARS-CoV-2 entry genes across tissues and demographics
Source: Springer Nature journal article supplement (doi:10.1038/s41591-020-01227-z), 2021-03-01

SUPPLEMENTAL FIGURE 1

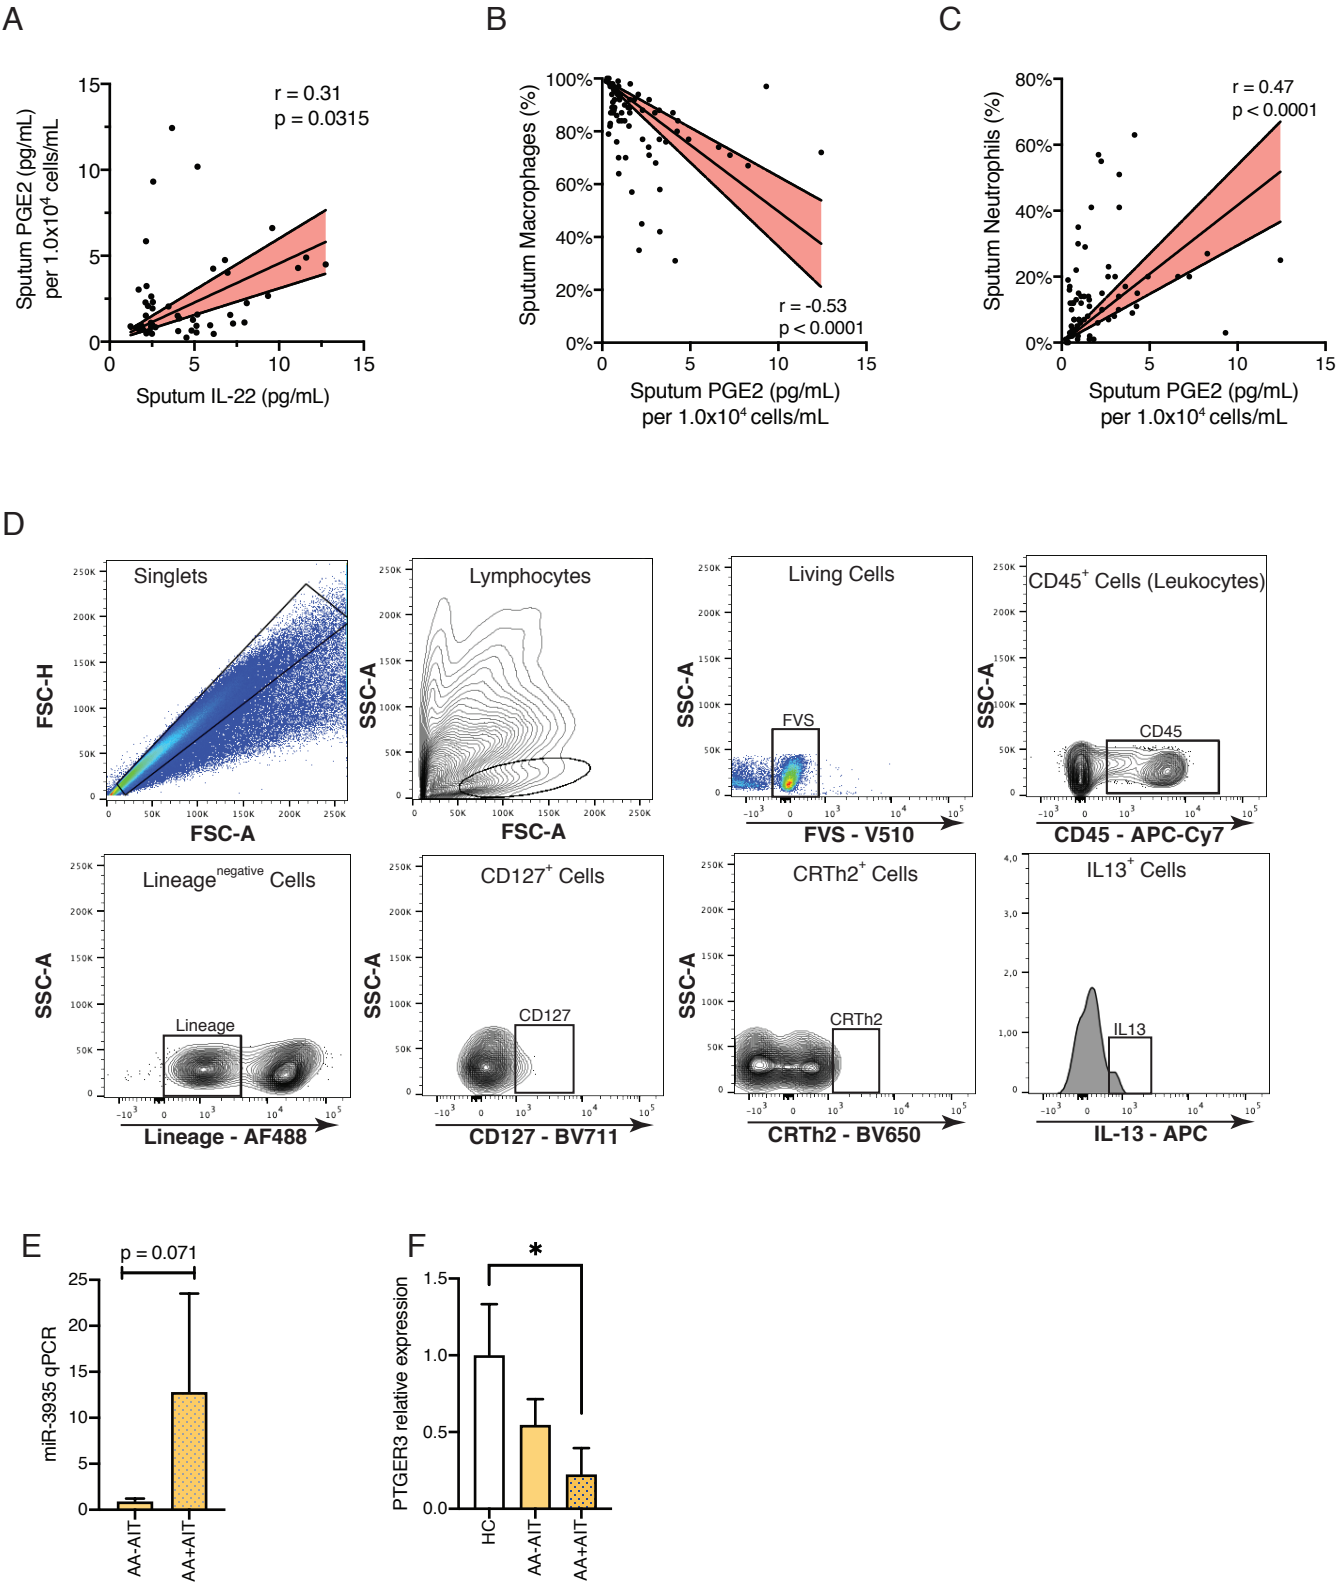

SUPPLEMENTAL FIGURE 2  
corresponding to Figure 2B

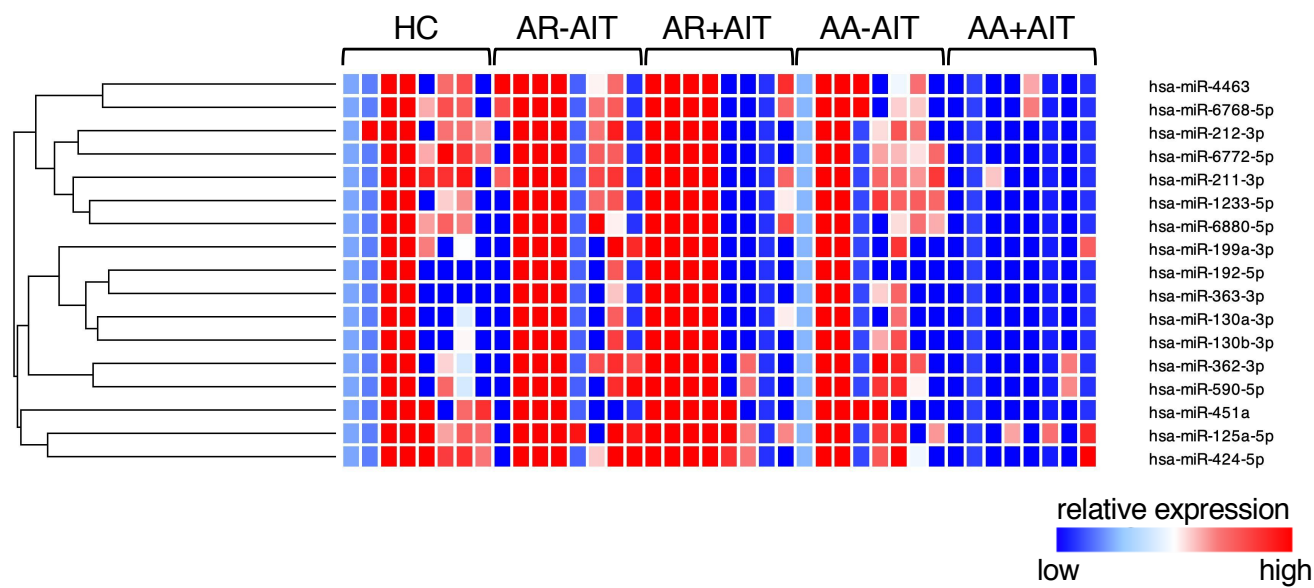

SUPPLEMENTAL FIGURE 3  
corresponding to Figure 2E

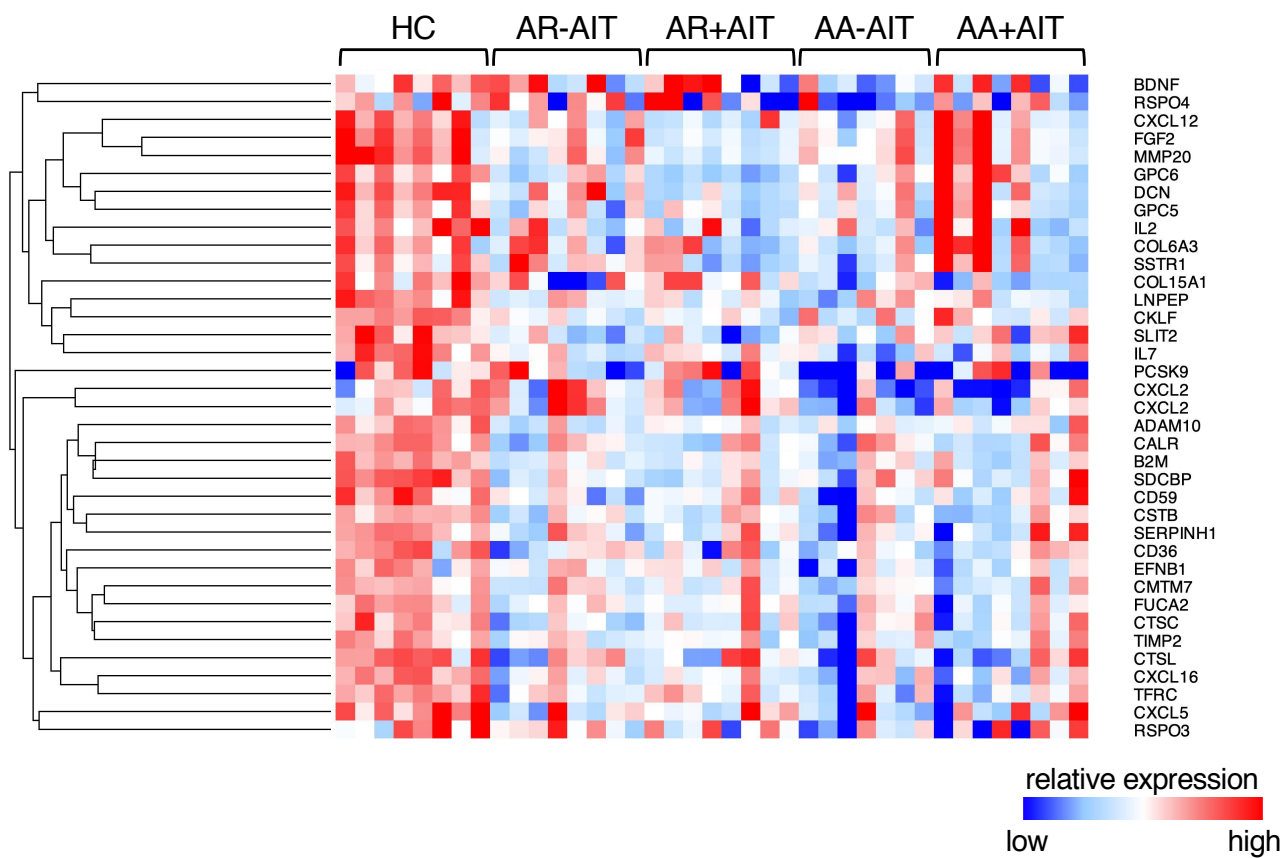

SUPPLEMENTAL FIGURE 4  
corresponding to Figure 3G

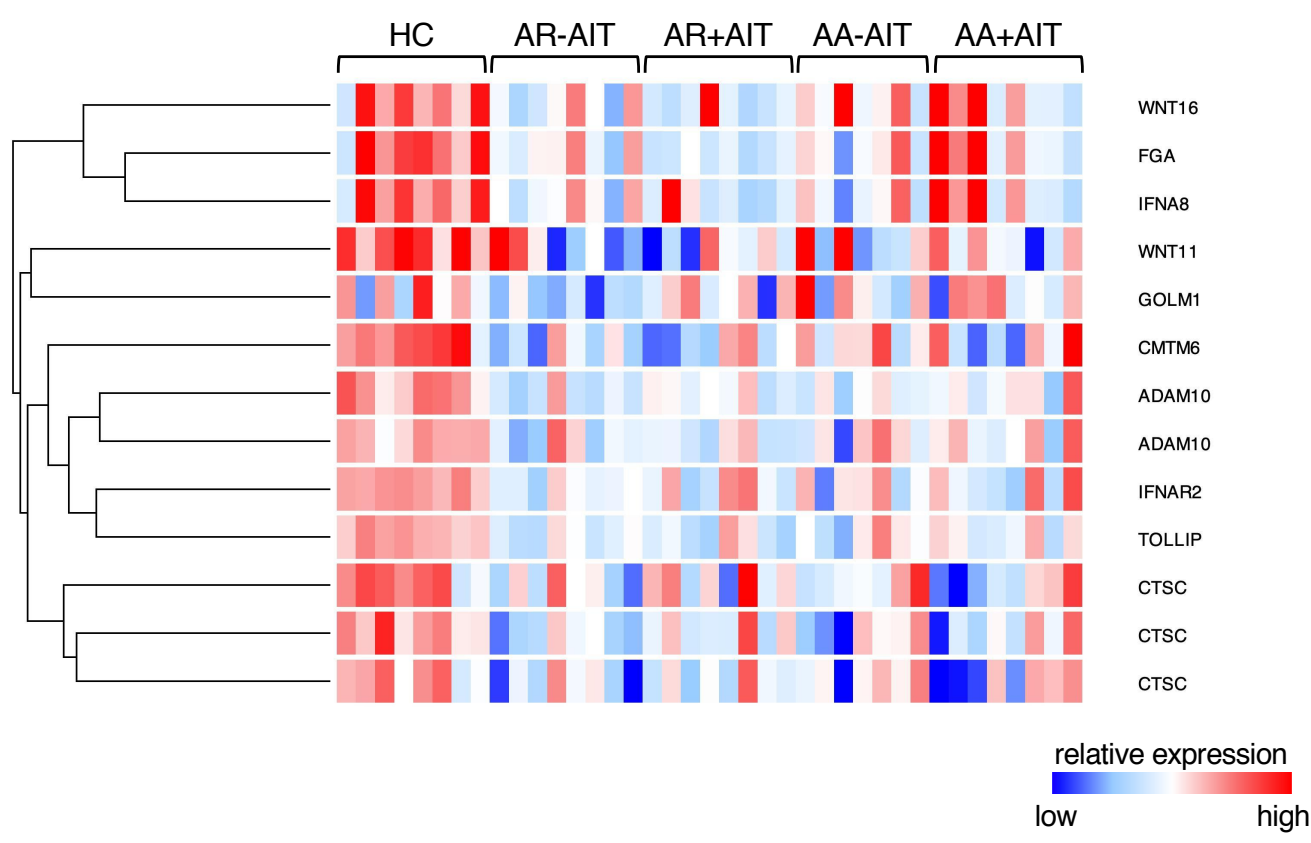

SUPPLEMENTAL FIGURE 5  
corresponding to Figure 3H

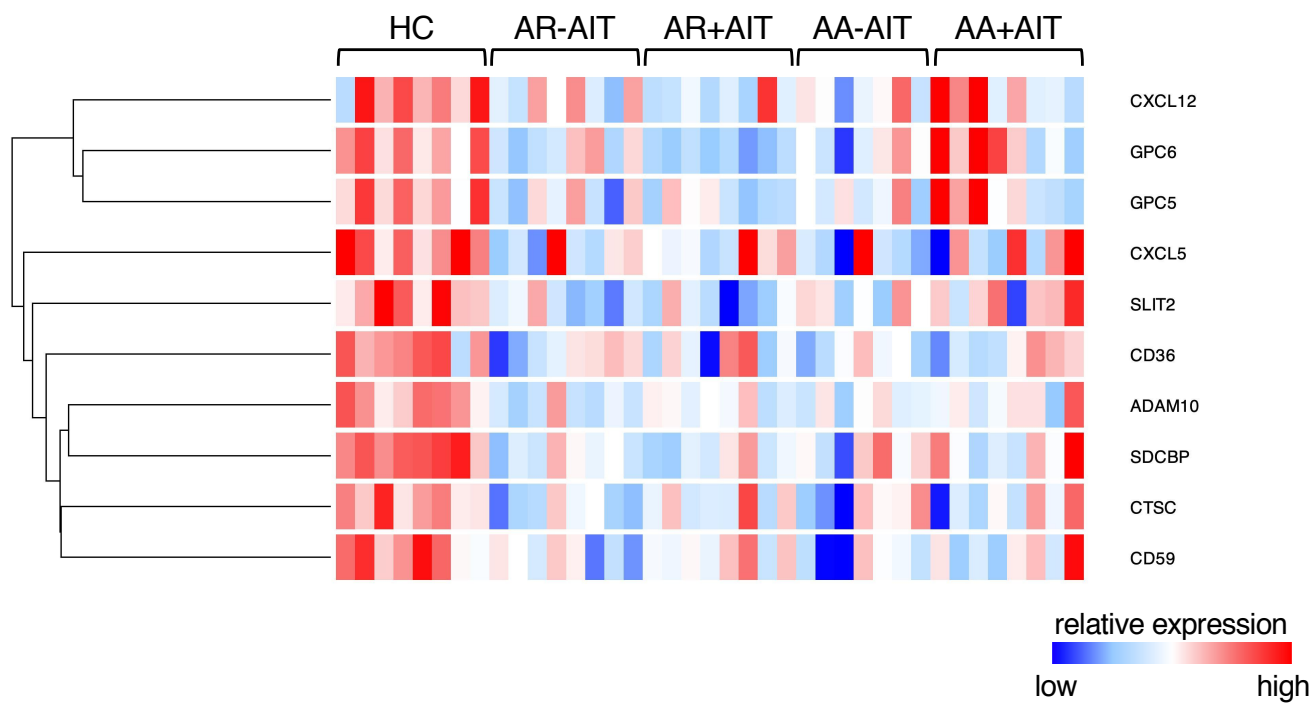

SUPPLEMENTAL FIGURE 6  
corresponding to Figure 3I

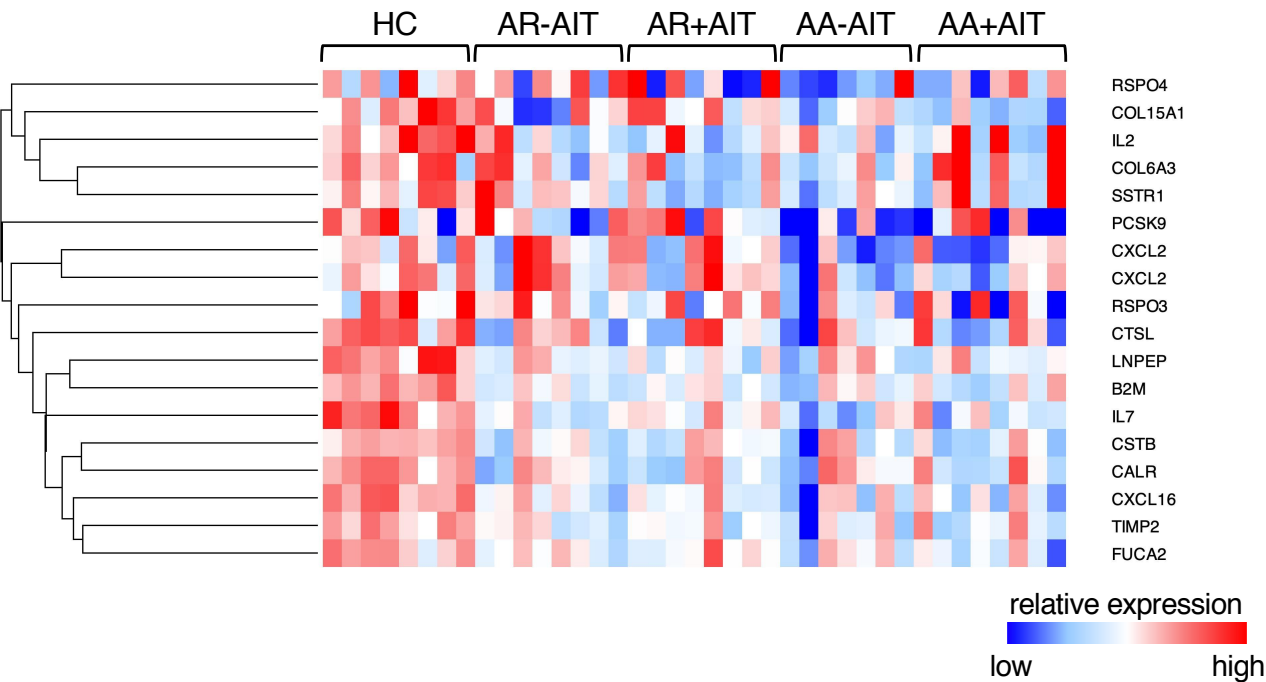

SUPPLEMENTAL FIGURE 7  
corresponding to Figure 4A

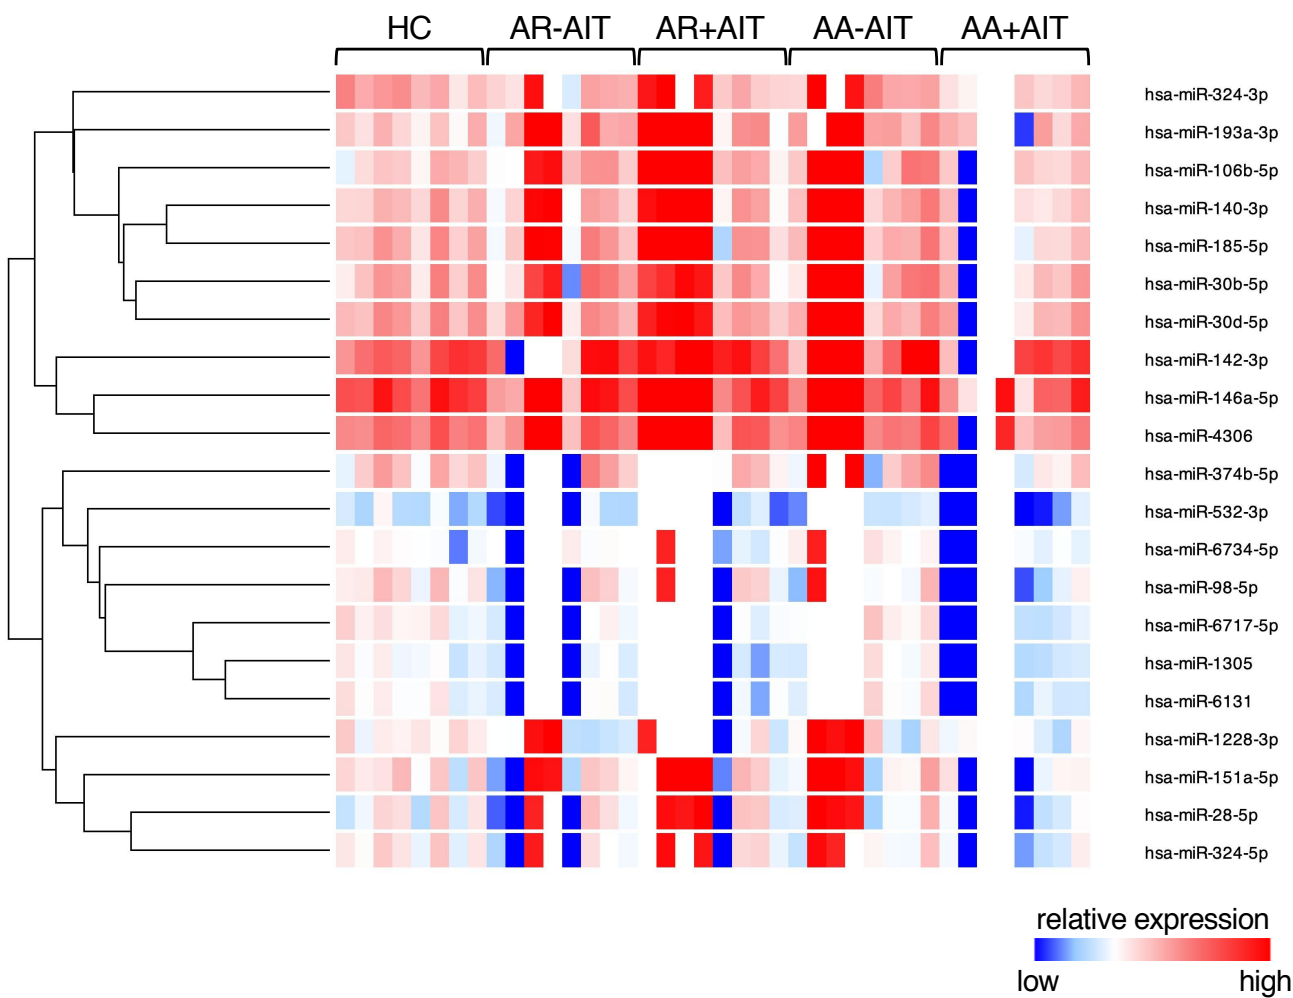

SUPPLEMENTAL FIGURE 8  
corresponding to Figure 4C

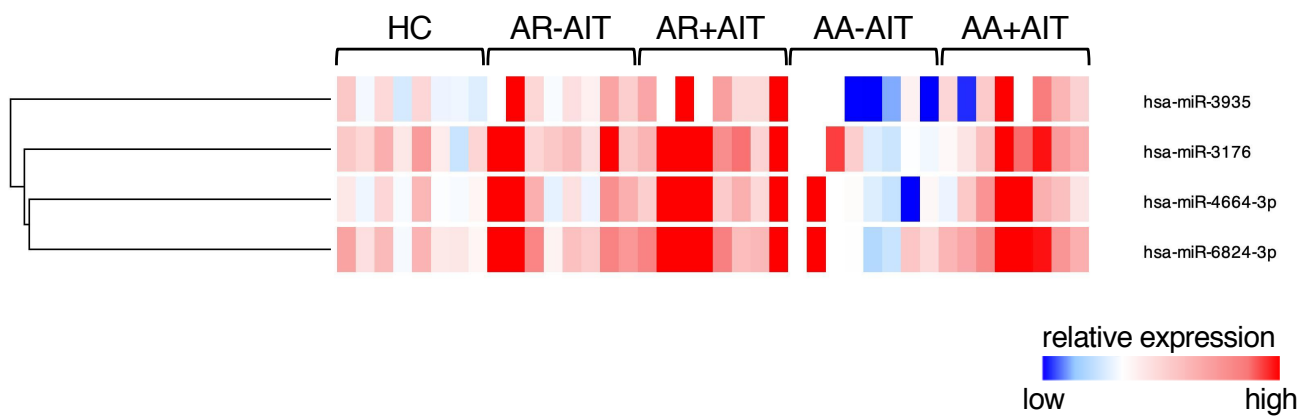

SUPPLEMENTAL FIGURE 9  
corresponding to Figure 4D

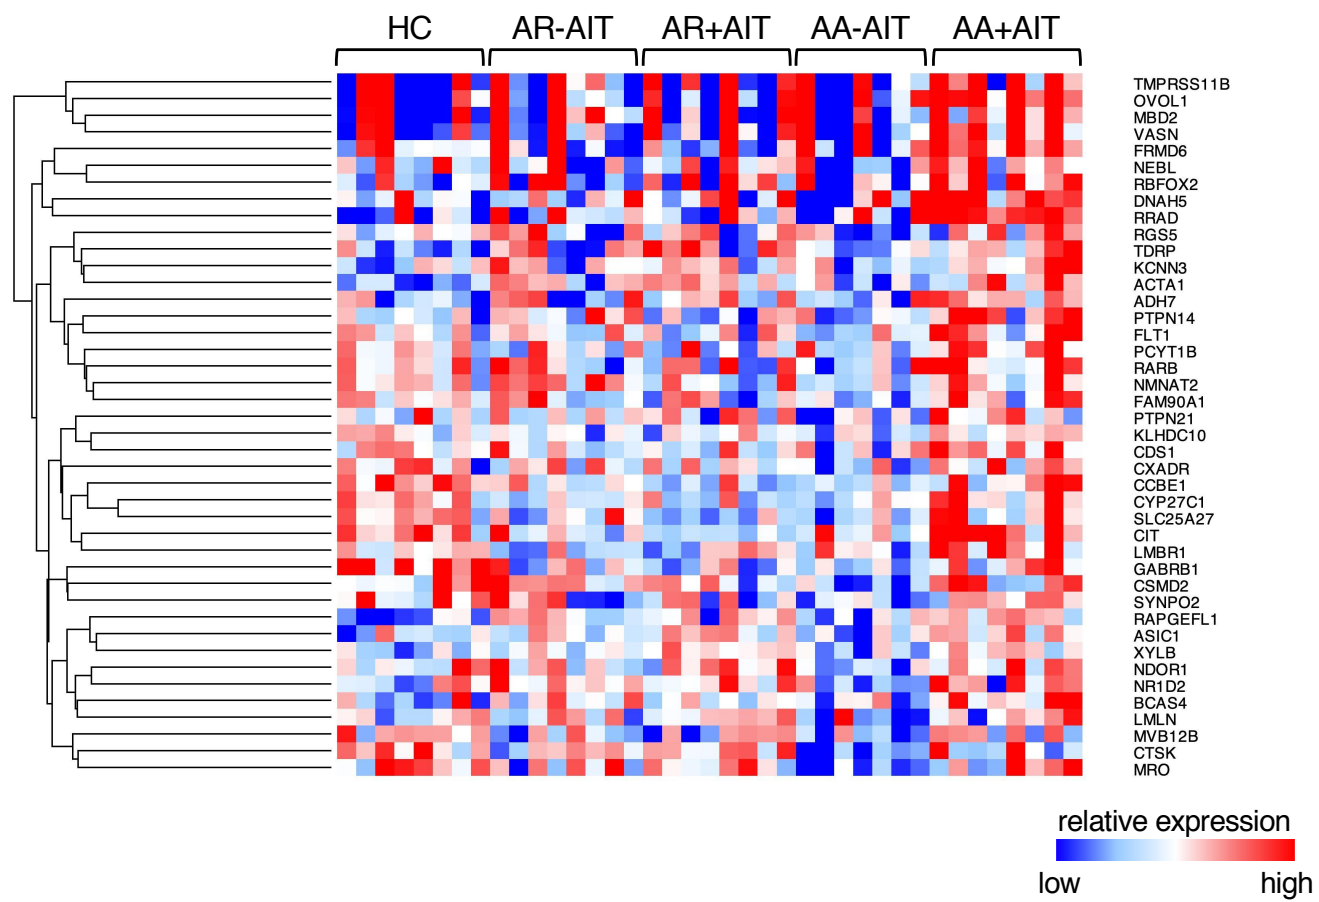

SUPPLEMENTAL FIGURE 10  
corresponding to Figure 4E

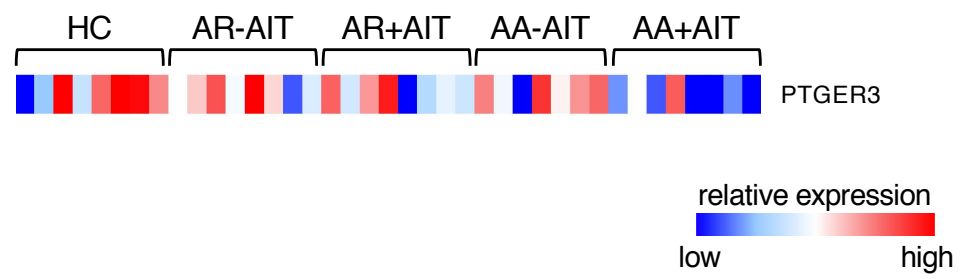

SUPPLEMENTAL FIGURE 11

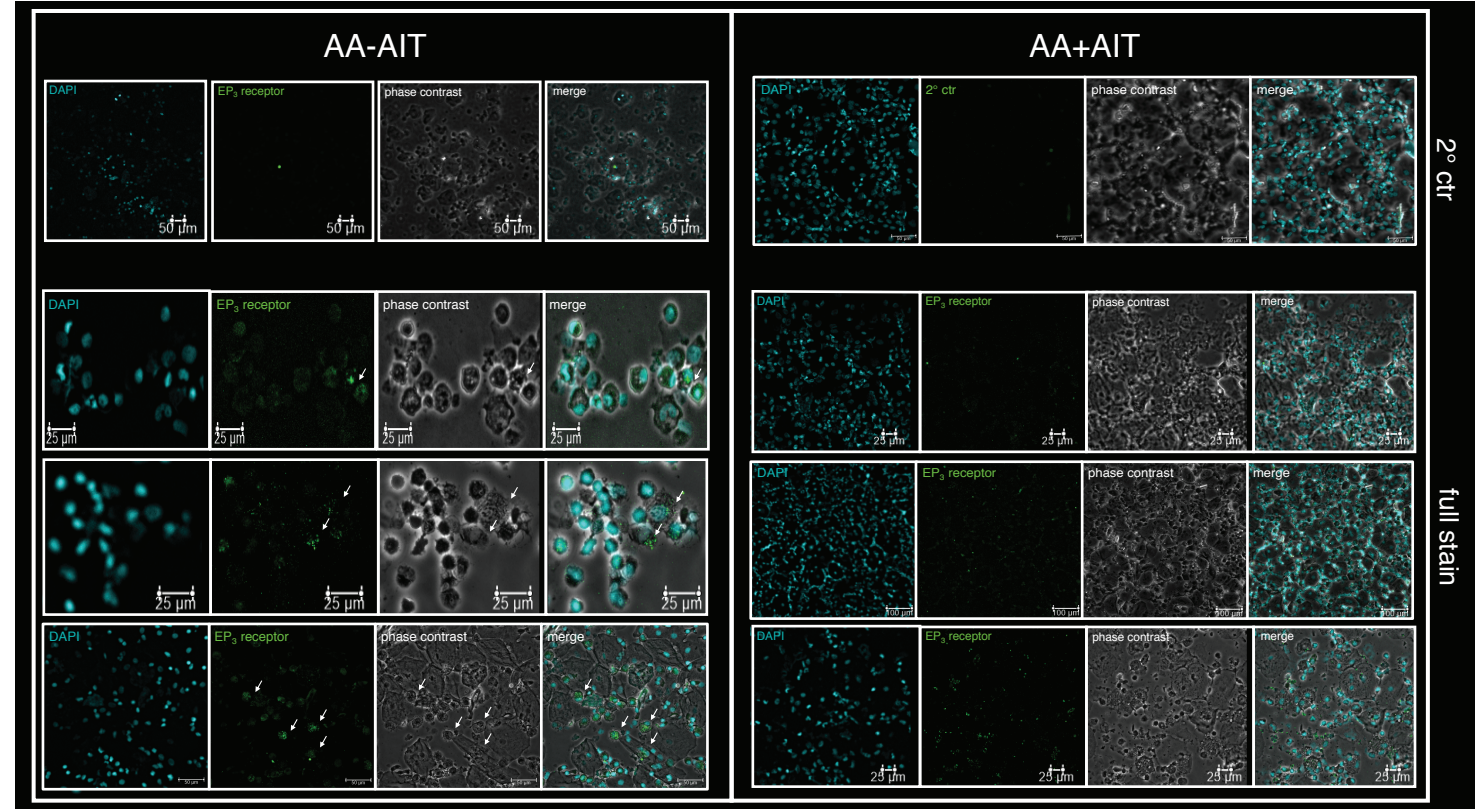

Supplement: MOESM2 [file 41591_2020_1227_MOESM2_ESM.pdf › 41591_2020_1227_MOESM2_ESM.pdf]
